# Supplementary material
Source: Springer Nature journal article supplement (https://www.springermedizin.de/resource/supplementary/12887_2013_1254_MOESM4_ESM.pdf/9476054)
Supplement: MOESM4 [file 9476054]

| Intervention Domain <sup>a</sup>                 | Efficacious Strategy <sup>b</sup>                           | Distal Outcomes <sup>a</sup> |                 |                      | Proximal Outcomes <sup>a</sup> |                   |                 | Primary Outcomes <sup>a</sup> |                               |                                                |                 |
|--------------------------------------------------|-------------------------------------------------------------|------------------------------|-----------------|----------------------|--------------------------------|-------------------|-----------------|-------------------------------|-------------------------------|------------------------------------------------|-----------------|
|                                                  |                                                             | Income & Resources           | Social Cohesion | Physical Environment | Family Influences              | School Influences | Peer Influences | Cognitive Development         | Social & Emotional Competence | Absence of Psychological & Behavioral Problems | Physical Health |
| Income & Resources                               | Affordable Housing: Tenant-Based Rental Assistance Programs |                              |                 |                      |                                |                   |                 |                               |                               |                                                |                 |
|                                                  | Child Mental Health Programs                                |                              |                 |                      |                                |                   |                 |                               |                               |                                                |                 |
| Social Cohesion                                  | Alternatives to Incarceration                               |                              |                 |                      |                                |                   |                 |                               |                               |                                                |                 |
|                                                  | Community-based Participatory Research                      |                              |                 |                      |                                |                   |                 |                               |                               |                                                |                 |
|                                                  | Mentoring Programs                                          |                              |                 |                      |                                |                   |                 |                               |                               |                                                |                 |
|                                                  | Neighborhood Watch Programs                                 |                              |                 |                      |                                |                   |                 |                               |                               |                                                |                 |
|                                                  | Organizational Changes to the Psychosocial Work Environment |                              |                 |                      |                                |                   |                 |                               |                               |                                                |                 |
| Physical Environment                             | Prison Re-entry                                             |                              |                 |                      |                                |                   |                 |                               |                               |                                                |                 |
|                                                  | Access to Places for Physical Activity                      |                              |                 |                      |                                |                   |                 |                               |                               |                                                |                 |
|                                                  | Alcoholic Beverage Excise Taxes                             |                              |                 |                      |                                |                   |                 |                               |                               |                                                |                 |
|                                                  | Alcohol Outlet Density                                      |                              |                 |                      |                                |                   |                 |                               |                               |                                                |                 |
|                                                  | Bicycle Helmet Use                                          |                              |                 |                      |                                |                   |                 |                               |                               |                                                |                 |
|                                                  | Booster Seat Use                                            |                              |                 |                      |                                |                   |                 |                               |                               |                                                |                 |
|                                                  | Drug Law Enforcement Programs                               |                              |                 |                      |                                |                   |                 |                               |                               |                                                |                 |
|                                                  | Enforcement of Minimum Legal Drinking Age Laws              |                              |                 |                      |                                |                   |                 |                               |                               |                                                |                 |
|                                                  | Graduated Drive Licensing                                   |                              |                 |                      |                                |                   |                 |                               |                               |                                                |                 |
|                                                  | Hours of Sales for Alcohol                                  |                              |                 |                      |                                |                   |                 |                               |                               |                                                |                 |
|                                                  | Red Light Cameras                                           |                              |                 |                      |                                |                   |                 |                               |                               |                                                |                 |
|                                                  | Responsible Beverage Service and Enforcement                |                              |                 |                      |                                |                   |                 |                               |                               |                                                |                 |
|                                                  | Safety Belt Laws and Enforcement                            |                              |                 |                      |                                |                   |                 |                               |                               |                                                |                 |
|                                                  | Street Lighting                                             |                              |                 |                      |                                |                   |                 |                               |                               |                                                |                 |
|                                                  | Youth Advertising Restrictions                              |                              |                 |                      |                                |                   |                 |                               |                               |                                                |                 |
|                                                  | Tobacco Excise Taxes                                        |                              |                 |                      |                                |                   |                 |                               |                               |                                                |                 |
|                                                  | Smoke-free Policies                                         |                              |                 |                      |                                |                   |                 |                               |                               |                                                |                 |
|                                                  | Urban Design and Land Use Policies                          |                              |                 |                      |                                |                   |                 |                               |                               |                                                |                 |
|                                                  | Water Fluoridation                                          |                              |                 |                      |                                |                   |                 |                               |                               |                                                |                 |
|                                                  | Family Influences                                           | Hot Spot Policing            |                 |                      |                                |                   |                 |                               |                               |                                                |                 |
| Access to Affordable (or Free) Quality Childcare |                                                             |                              |                 |                      |                                |                   |                 |                               |                               |                                                |                 |
| Breast Feeding Support                           |                                                             |                              |                 |                      |                                |                   |                 |                               |                               |                                                |                 |
| Kinship Care when Taken from Home                |                                                             |                              |                 |                      |                                |                   |                 |                               |                               |                                                |                 |
| Home Safety Education                            |                                                             |                              |                 |                      |                                |                   |                 |                               |                               |                                                |                 |
| Home Visiting Programs                           |                                                             |                              |                 |                      |                                |                   |                 |                               |                               |                                                |                 |
| Parent Involvement in Child's Education          |                                                             |                              |                 |                      |                                |                   |                 |                               |                               |                                                |                 |
| Prenatal Micronutrient Supplementation           |                                                             |                              |                 |                      |                                |                   |                 |                               |                               |                                                |                 |
| School Influences                                | Treatment Foster Care                                       |                              |                 |                      |                                |                   |                 |                               |                               |                                                |                 |
|                                                  | After-School Programs that Include Academic Support         |                              |                 |                      |                                |                   |                 |                               |                               |                                                |                 |
|                                                  | Class Size Reductions                                       |                              |                 |                      |                                |                   |                 |                               |                               |                                                |                 |
|                                                  | Positive Behavior Support                                   |                              |                 |                      |                                |                   |                 |                               |                               |                                                |                 |
|                                                  | Quality Preschool/Early Childhood Education                 |                              |                 |                      |                                |                   |                 |                               |                               |                                                |                 |
|                                                  | School-Based Physical Activity Programs                     |                              |                 |                      |                                |                   |                 |                               |                               |                                                |                 |
|                                                  | School Nutrition Standards for School Lunch Programs        |                              |                 |                      |                                |                   |                 |                               |                               |                                                |                 |
|                                                  | School Vocational Training Programs                         |                              |                 |                      |                                |                   |                 |                               |                               |                                                |                 |
| Peer Influences                                  | Sexual Health Education and Contraceptive Interventions     |                              |                 |                      |                                |                   |                 |                               |                               |                                                |                 |
|                                                  | Volunteer Tutoring Programs                                 |                              |                 |                      |                                |                   |                 |                               |                               |                                                |                 |
|                                                  | After-School Programs that Promote Personal/Social Skills   |                              |                 |                      |                                |                   |                 |                               |                               |                                                |                 |
| Peer Influences                                  | School-Based Efforts to Reduce Bullying                     |                              |                 |                      |                                |                   |                 |                               |                               |                                                |                 |

| Key                                                                                |                               |
|------------------------------------------------------------------------------------|-------------------------------|
|  | Large effect sizes reported.  |
|  | Medium effect sizes reported. |
|  | Small effect sizes reported.  |
|  | No effect sizes reported.     |
